# Supplementary material
Source: publisher figshare collection journal article supplement (https://tandf.figshare.com/ndownloader/files/13525190)
Supplement: Supplementary file 1 [file 13525190]

Supplementary Table 2

Association between platelet count and ADP, ASPI, COL and TRAP dependent platelet function test

|  | ADP | p | ASPI | p | COL | p | TRAP | p |
| --- | --- | --- | --- | --- | --- | --- | --- | --- |
| i | r=0.402 | <0.001 | r=0.239 | 0.018 | r=0.255 | 0.012 | r=0.382 | <0.001 |
| ii | r=0.586 | <0.001 | r=0.434 | <0.001 | r=0.174 | 0.09 | r=0.382 | <0.001 |
| iii | r=0.559 | <0.001 | r=0.533 | <0.001 | r=0.339 | 0.001 | r=0.383 | <0.001 |
| iv | r=0.317 | 0.001 | r=0.437 | <0.001 | r=0.353 | <0.001 | r=0.316 | 0.001 |

Time points; baseline (i), during CPB (ii), after CPB decanulation and protamine (iii) and arrival at the ICU (iv).
